# Supplementary material for: In vivo generation of a mature and functional artificial skeletal muscle
Source: PubMed Central journal article supplement (PMC4403043; doi:10.15252/emmm.201404062), 2015-02-25
Supplement: emmm0007-0411-sd9.pdf [file emmm0007-0411-sd9.pdf]

Source Data Figure 4W-Y

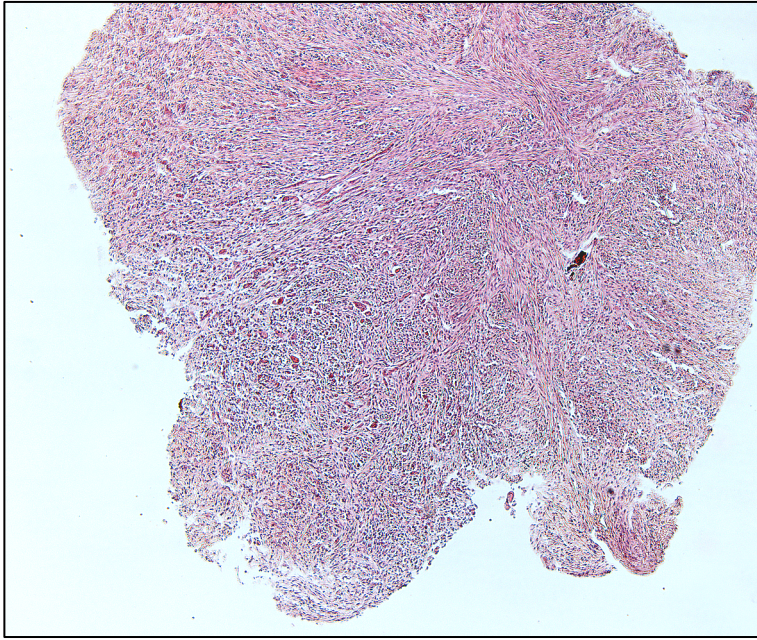

PF+Mabs 10gg 5Xa

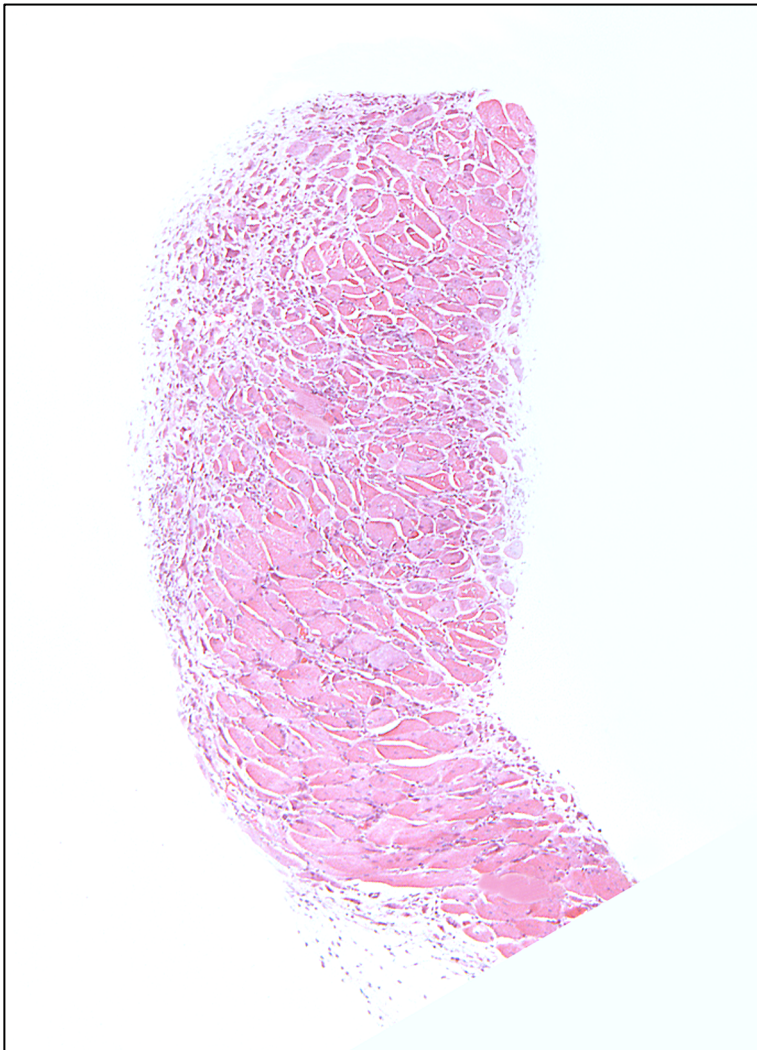

PF+Mabs 6 months 5Xa

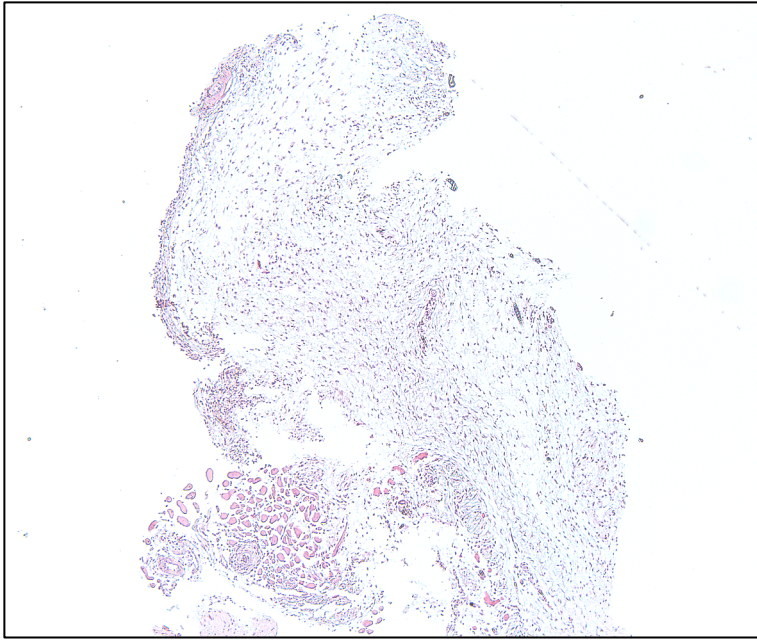

Control 10gg 5Xa

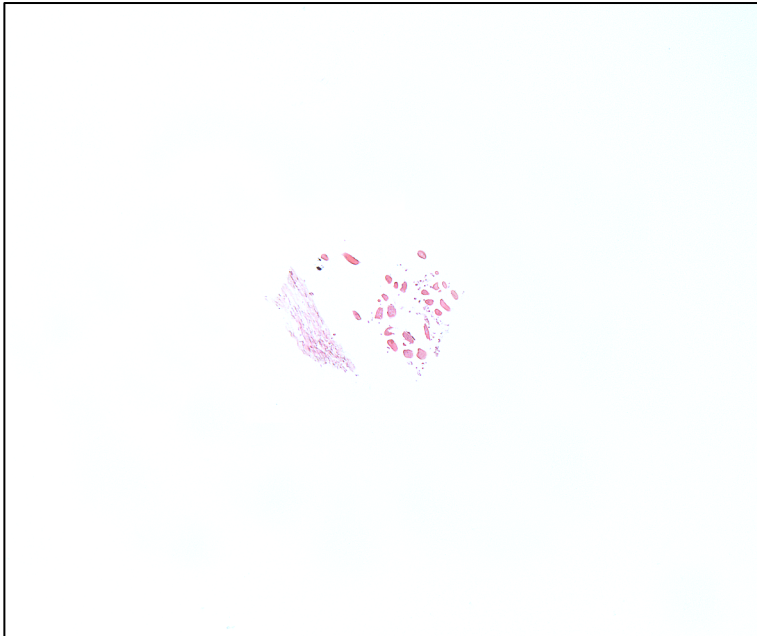

Control 6 months 5Xa
